# Supplementary material for: High endothelial venule is a surrogate biomarker for T-cell inflamed tumor microenvironment and prognosis in gastric cancer
Source: PubMed Central journal article supplement — J Immunother Cancer. 2021 Oct 20;9(10):e003353. doi: 10.1136/jitc-2021-003353 (PMC8529985; doi:10.1136/jitc-2021-003353), 2021-10-20
Supplement: jitc-2021-003353supp001.pdf [file jitc-2021-003353supp001.pdf]

**ONLINE SUPPLEMENTAL FIGURE LEGENDS**

**Figure S1.** Tregs and PD-L1 expression on tumor cells were not associated with HEV density.

(A) HEV expression (detected by MECA-79 staining) in a surgically resected GC tissue was categorized into the low and high status based on the median value of HEV density ( $27.8/\text{cm}^2$ ). Lymphocytes stained with anti-Foxp3 and tumor cells stained with anti-PD-L1 antibody were evaluated for their relationship with HEV density. (B) Quantification of the Foxp3-positive area and the PD-L1-positive area was performed, and the data were statistically compared according to HEV density. Values are presented as mean  $\pm$  SEM. Scale bars: 200  $\mu\text{m}$ .

HEV, high endothelial venules; GC, gastric cancer

**Figure S2.** Correlation between chemokine ligands (CCL8, CCL2, and CCL3) and immune cell subsets (CD8 and CD4). Pearson's correlation coefficient was calculated to determine the relationships among variables.

CCL, chemokine ligands
