# Supplementary material for: High endothelial venule is a surrogate biomarker for T-cell inflamed tumor microenvironment and prognosis in gastric cancer
Source: HighWire-hosted journal article supplement (doi:10.1136/jitc-2021-003353), 2021-10-01
Supplement: jitc-2021-003353supp004_data_supplement.xlsx [file jitc-2021-003353supp004_data_supplement.xlsx]

## Sheet: Table S1
Supplemental table S1. Difference of clinicopathologic factors according to the lymphoid reaction score
Parameter		N=452(%)	Crohn-like lymphoid reaction			p	Peritumoral lymphoid reaction			p	Intratumoral lymphoid reaction			p
			Score 0	Score 1	Score 2-3		Score 0	Score 1	Score 2-3		Score 0	Score 1	Score 2-3
			N=75(%)	N=203(%)	N=174(%)		N=83(%)	N= 226(%)	N= 143(%)		N=29(%)	N=304(%)	N=119(%)
Sex						0.774				0.007				0.077
	Male	297(65.7)	48(16.2)	137(46.1)	112(37.7)		43(14.5)	151(50.8)	103(34.7)		17(5.7)	192(64.6)	88(29.6)
	Female	155(34.3)	27(17.4)	66(42.6)	62(40.0)		40(25.8)	75(48.4)	40(25.8)		12(7.7)	112(72.3)	31(20.0)
Age						0.984				0.313				0.262
	< 58	223(49.3)	37(16.6)	99(44.4)	87(39.0)		43(19.3)	117(52.5)	63(28.3)		17(7.6)	154(69.1)	52(23.3)
	≥ 58	229(50.7)	38(16.6)	104(45.4)	87(38.0)		40(17.5)	109(47.6)	80(34.9)		12(5.2)	150(65.5)	67(29.3)
Histology						0.003				<0.001				0.017
	WD/MD	172(38.1)	34(19.8)	89(51.7)	49(28.5)		12(7.0)	91(52.9)	69(40.1)		13(7.6)	102(59.3)	57(33.1)
	PD/SRC	280(61.9)	41(14.6)	114(40.7)	125(44.6)		71(25.4)	135(48.2)	74(26.4)		16(5.7)	202(72.1)	62(22.1)
Lauren type						0.001				<0.001				<0.001
	Intestinal	220(48.7)	41(18.6)	113(51.4)	66(30.0)		16(7.3)	108(49.1)	96(43.6)		19(8.6)	127(57.7)	74(33.6)
	Diffuse	232(51.3)	34(14.7)	90(38.8)	108(46.6)		67(28.9)	118(50.9)	47(20.3)		10(4.3)	177(76.3)	45(19.4)
Location						0.001				0.008				0.006
	Upper 1/3	85(18.8)	15(17.6)	25(29.4)	45(52.9)		9(10.6)	41(48.2)	35(41.2)		9(10.6)	42(49.4)	34(40.0)
	Mid 1/3	105(23.2)	11(10.5)	51(48.6)	43(41.0)		30(28.6)	45(42.9)	30(28.6)		5(4.8)	71(67.6)	29(27.6)
	Lower 1/3	258(57.1)	47(18.2)	127(49.2)	84(32.6)		42(16.3)	139(53.9)	77(29.8)		15(5.8)	187(72.5)	56(21.7)
	Whole	4(0.9)	2(50.0)	0(0)	2(50.6)		2(50.0)	1(25.0)	1(25.0)		0(0)	4(100.0)	0(0)
T stage						<0.001				<0.001				0.497
	pT1	145(32.1)	34(23.4)	77(53.1)	34(23.4)		15(10.3)	98(67.6)	32(22.1)		6(4.1)	101(69.7)	38(26.2)
	pT2	59(13.1)	11(18.6)	31(52.5)	17(28.8)		12(20.3)	21(35.6)	26(44.1)		3(5.1)	39(66.1)	17(28.8)
	pT3	103(22.8)	8(7.8)	40(38.8)	55(53.4)		14(13.6)	46(44.7)	43(41.7)		5(4.9)	69(67.0)	29(28.2)
	pT4	145(32.1)	22(15.2)	55(37.9)	68(46.9)		42(29.0)	61(42.1)	42(29.0)		15(10.3)	95(65.5)	35(24.1)
N stage						0.491				0.175				0.652
	pN0	202(44.7)	35(17.3)	99(49.0)	68(33.7)		32(15.8)	116(57.4)	54(26.7)		13(6.4)	141(69.8)	48(23.8)
	pN1	71(15.7)	11(15.5)	33(46.5)	27(38.0)		14(19.7)	30(42.3)	27(38.0)		5(7.0)	44(62.0)	22(31.0)
	pN2	86(19.0)	12(14.0)	36(41.9)	38(44.2)		16(18.6)	39(45.3)	31(36.0)		3(3.5)	57(66.3)	26(30.2)
	pN3	93(20.6)	17(18.3)	35(37.6)	41(44.1)		21(22.6)	41(44.1)	31(33.3)		8(8.6)	62(66.7)	23(24.7)
TNM stage						0.001				<0.001				0.93
	I	139(30.8)	31(22.3)	74(53.2)	34(24.5)		15(10.8)	92(66.2)	32(23.0)		7(5.0)	97(69.8)	35(25.2)
	II	144(31.9)	19(13.2)	64(44.4)	61(42.4)		32(22.2)	62(43.1)	50(34.7)		10(6.9)	95(66.0)	39(27.1)
	III	169(37.4)	25(14.8)	65(38.5)	79(46.7)		36(21.3)	72(42.6)	61(36.1)		12(7.1)	112(66.3)	45(26.6)
N, number; P, p-value; WD, well differentiated; MD, moderate differentiated; PD, poorly differentiated; SRC, signet ring cell
