# Supplementary figures and images for: High endothelial venule is a surrogate biomarker for T-cell inflamed tumor microenvironment and prognosis in gastric cancer
Source: PubMed Central journal article supplement — J Immunother Cancer. 2021 Oct 20;9(10):e003353. doi: 10.1136/jitc-2021-003353 (PMC8529985; doi:10.1136/jitc-2021-003353), 2021-10-20

## Supplemental figure S1

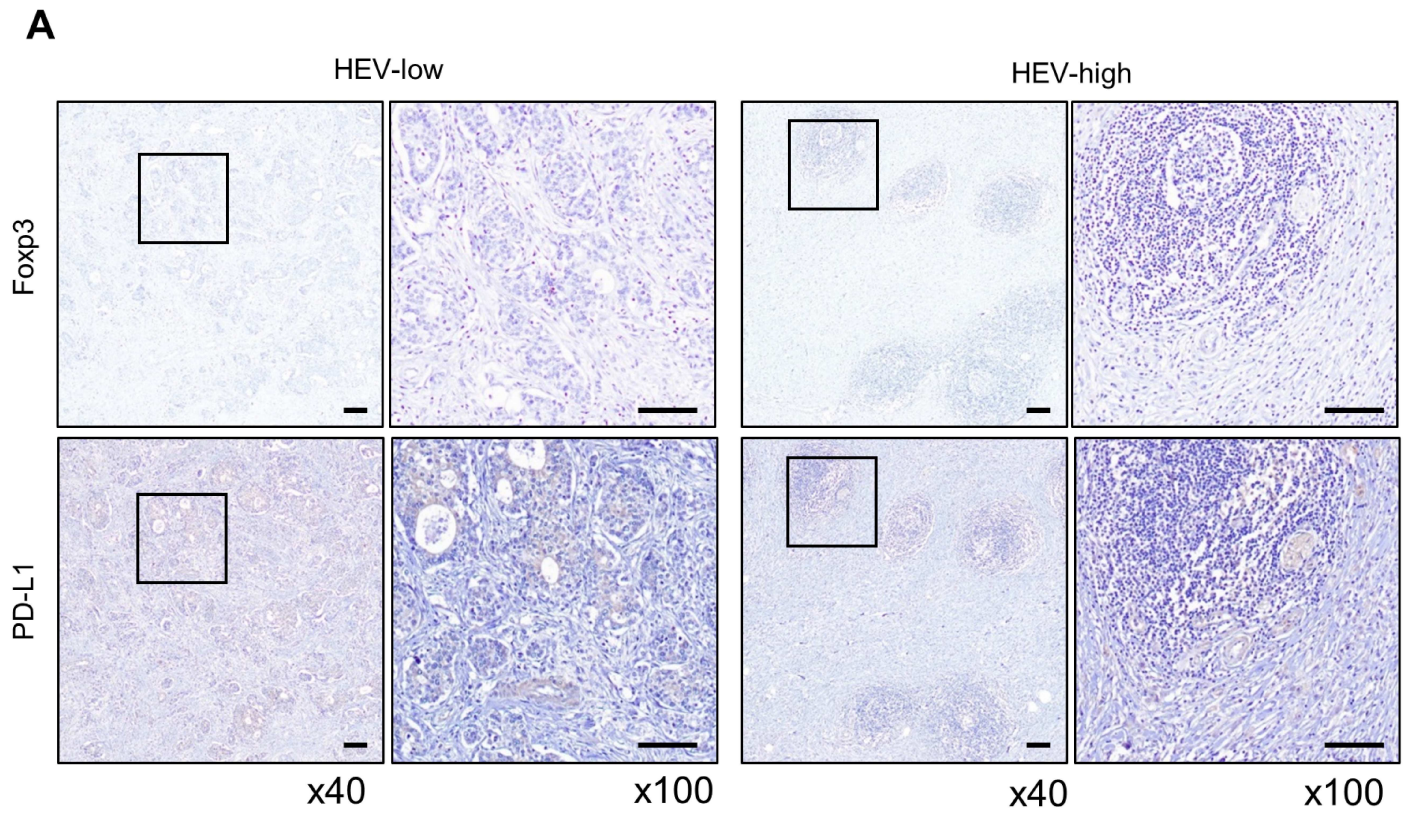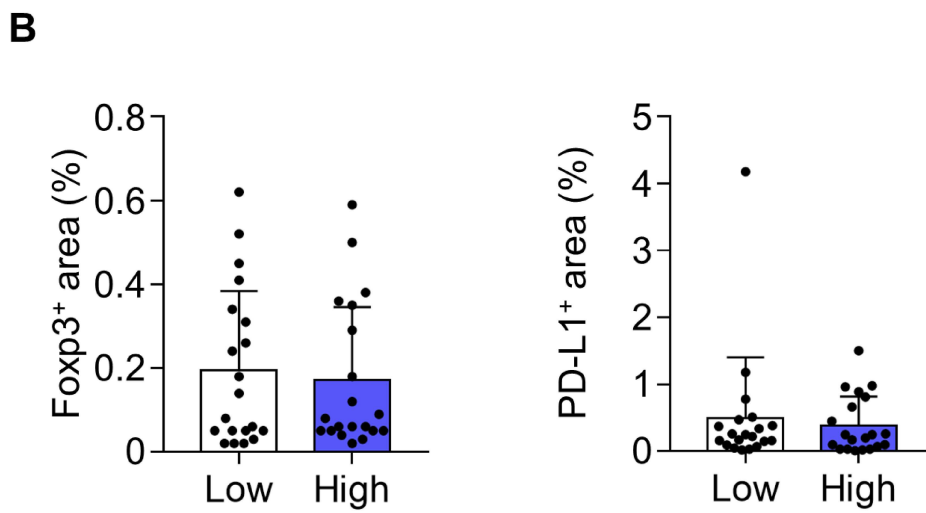

Supplement: jitc-2021-003353supp002.pdf [file jitc-2021-003353supp002.pdf]

**Supplemental figure S2**

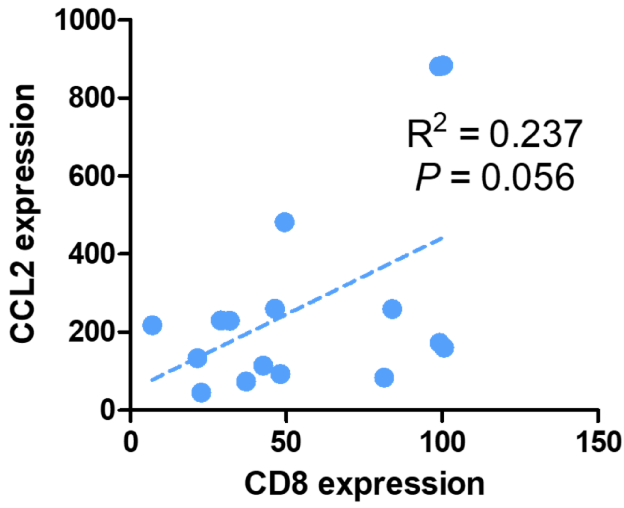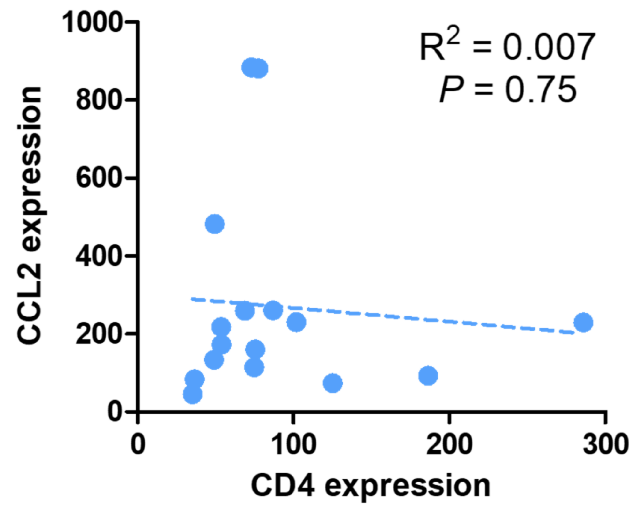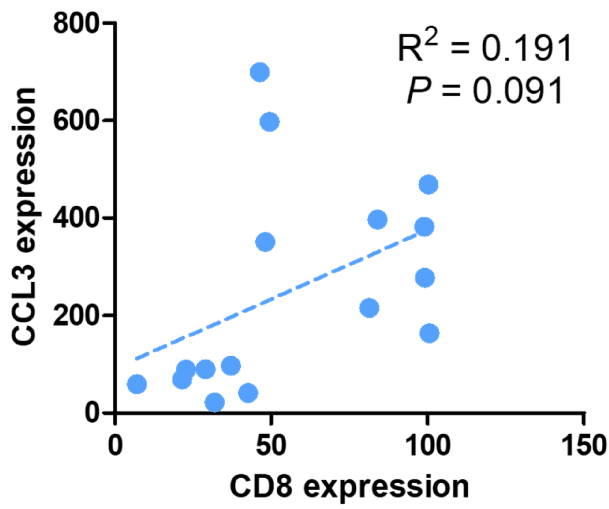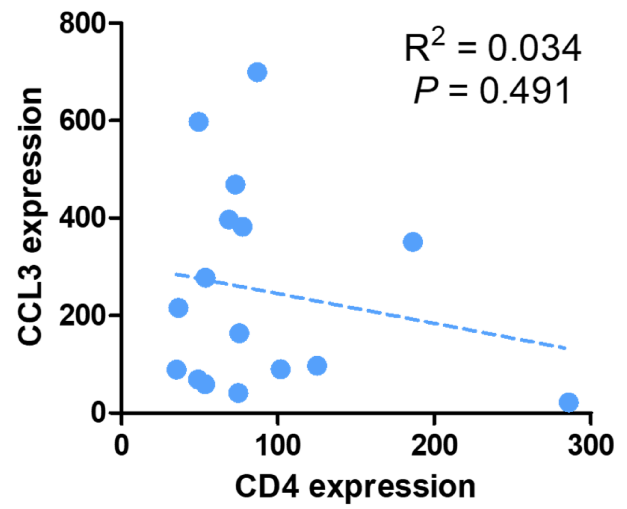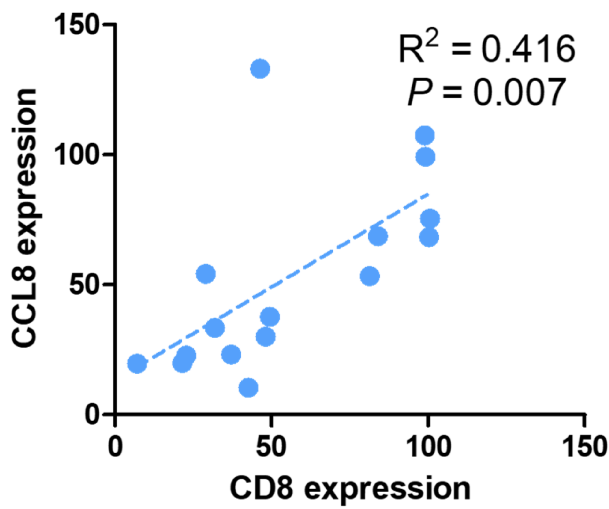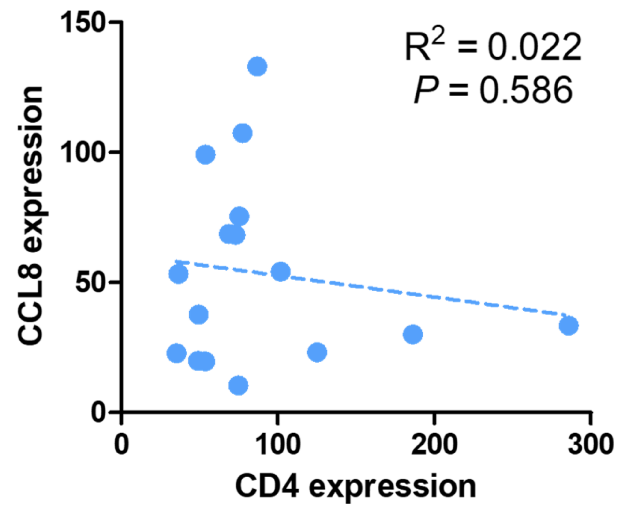

Supplement: jitc-2021-003353supp003.pdf [file jitc-2021-003353supp003.pdf]
