# Supplementary figures and images for: High endothelial venule is a surrogate biomarker for T-cell inflamed tumor microenvironment and prognosis in gastric cancer
Source: HighWire-hosted journal article supplement (doi:10.1136/jitc-2021-003353), 2021-10-01

## Supplemental figure S2

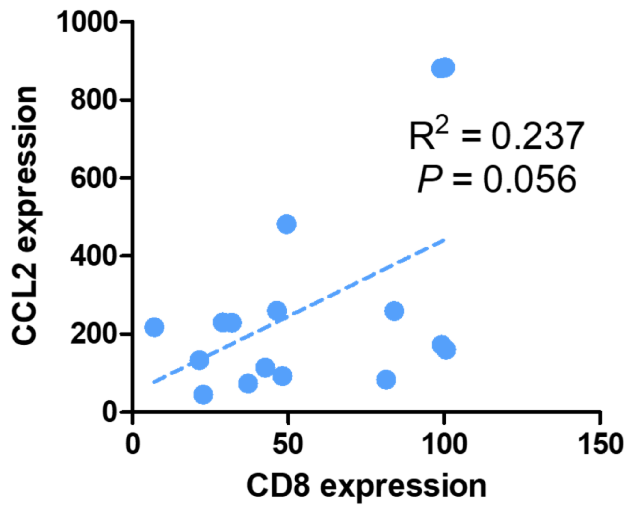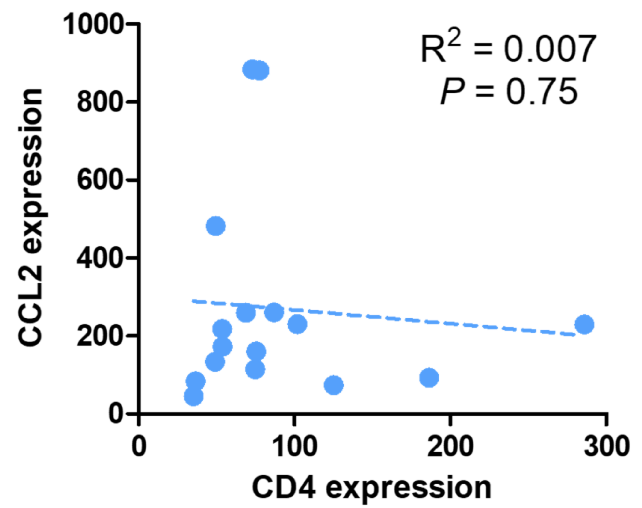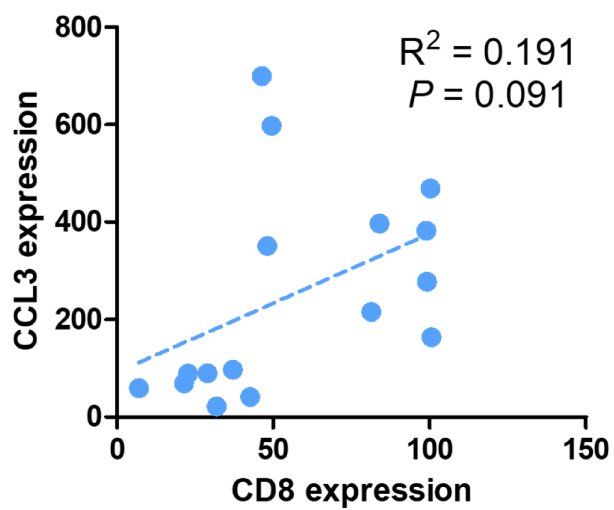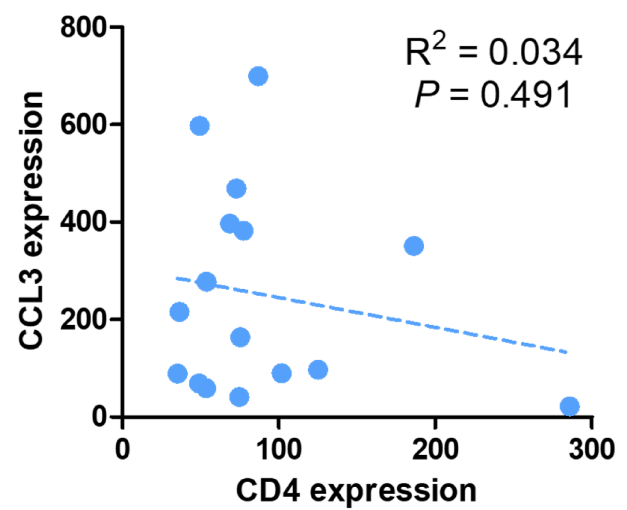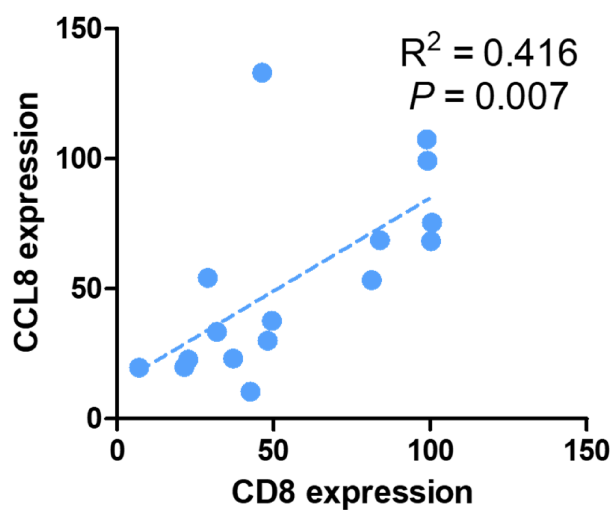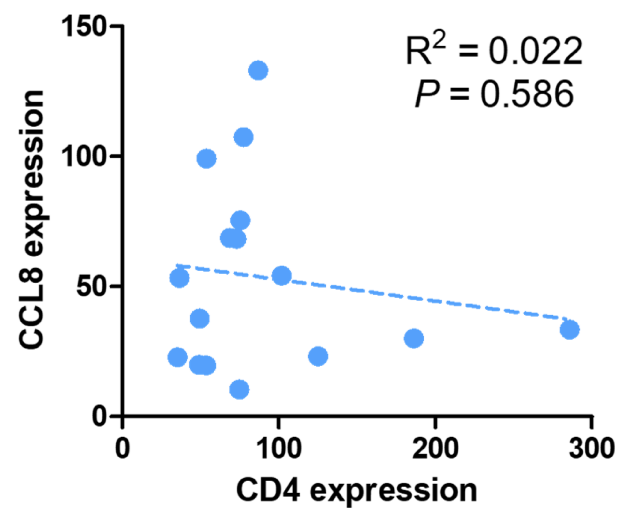

Supplement: jitc-2021-003353supp003_data_supplement.pdf [file jitc-2021-003353supp003_data_supplement.pdf]
